# Supplementary material for: An in vitro evaluation of the effects of different statins on the structure and function of human gut bacterial community
Source: PubMed Central journal article supplement (PMC7098552; doi:10.1371/journal.pone.0230200), 2020-03-26

## S2 Fig Chromatograms and standard curves of statins.

Standard sample of DMSO: 2.797 min

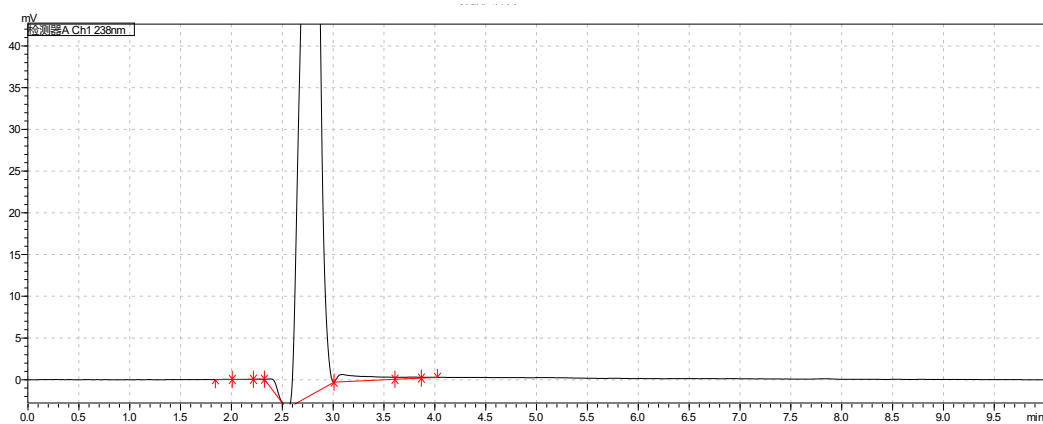

Standard sample of ROS (4.139 min; LOD=0.0143; LOQ=0.048  $\mu\text{g/mL}$ )

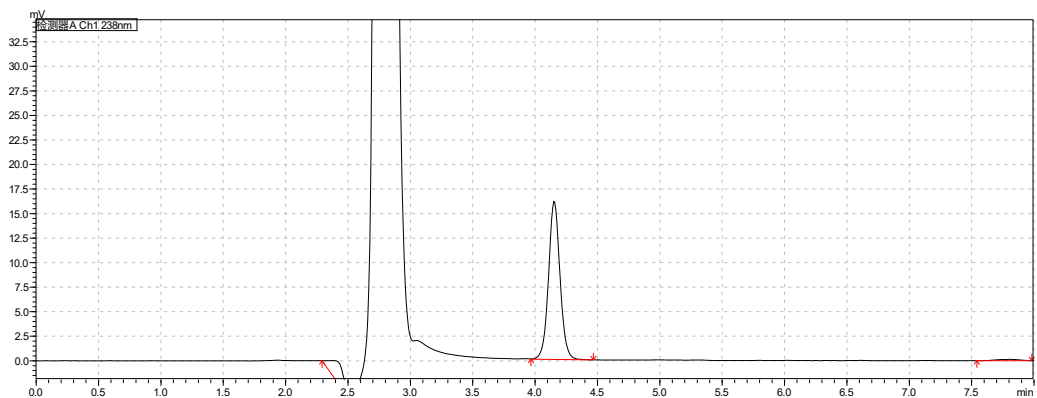

Standard sample of ATO (6.117 min; LOD=0.038; LOQ=0.124  $\mu\text{g/mL}$ )

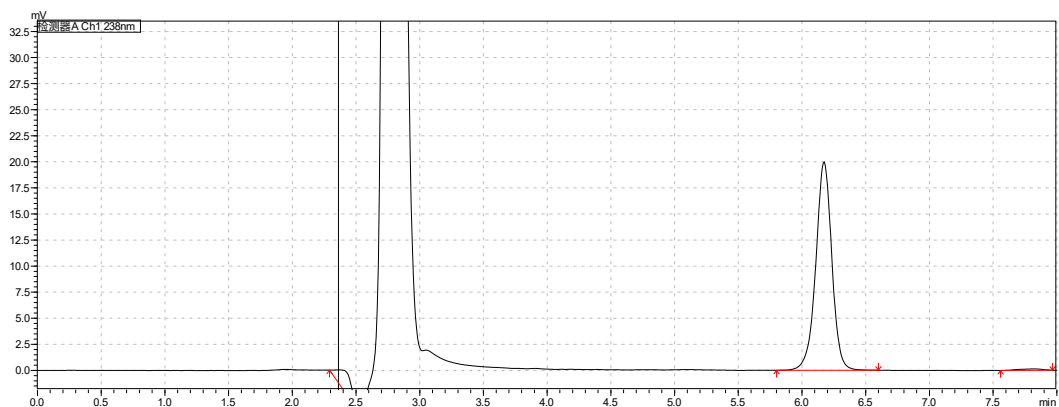

Standard sample of FLU (6.571 min; LOD=0.018; LOQ=0.06 µg/mL)

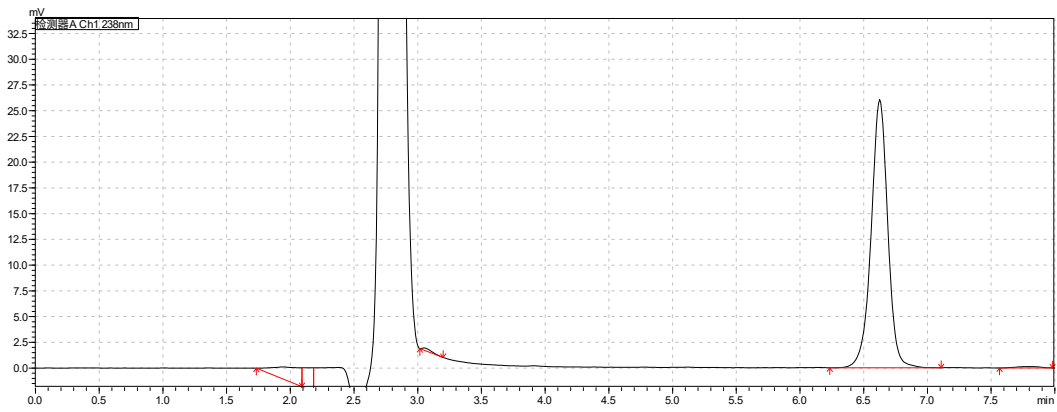

Standard sample of SIM (19.118 min; LOD=0.168; LOQ=0.560 µg/mL)

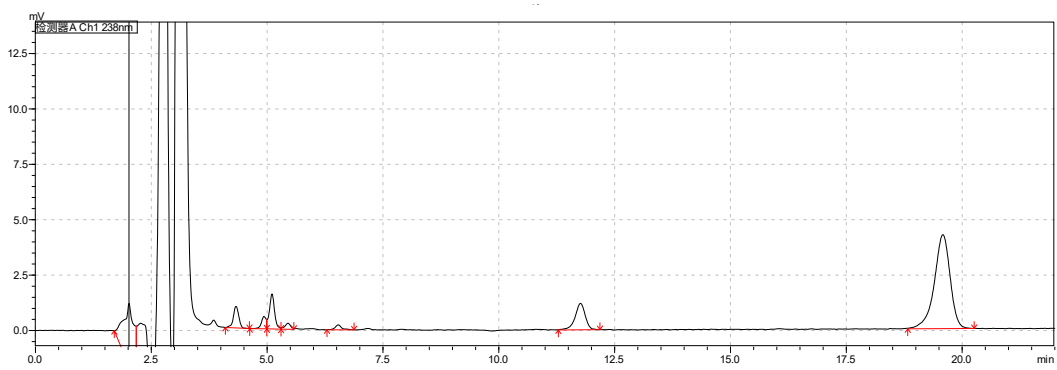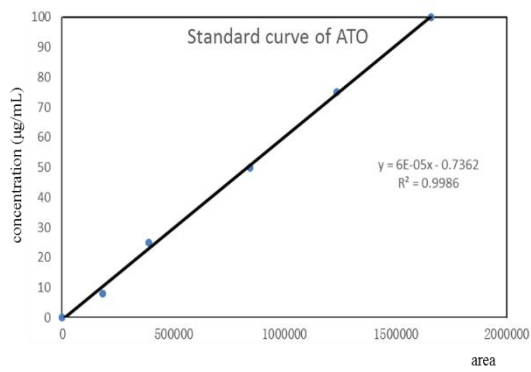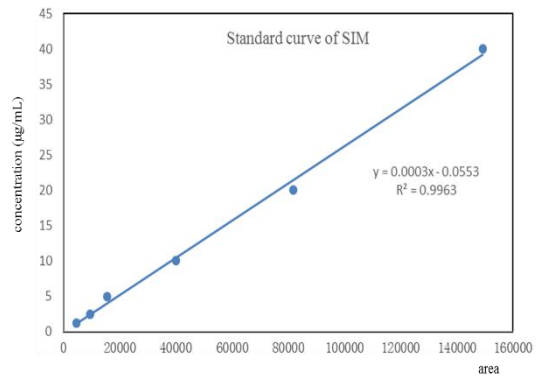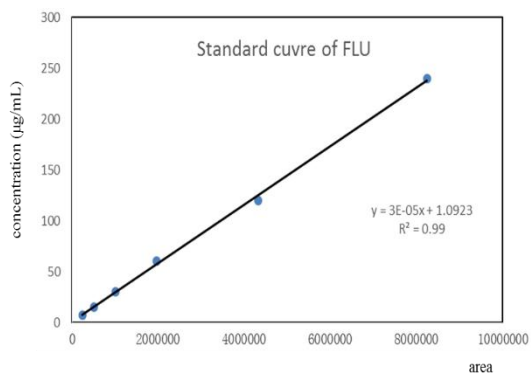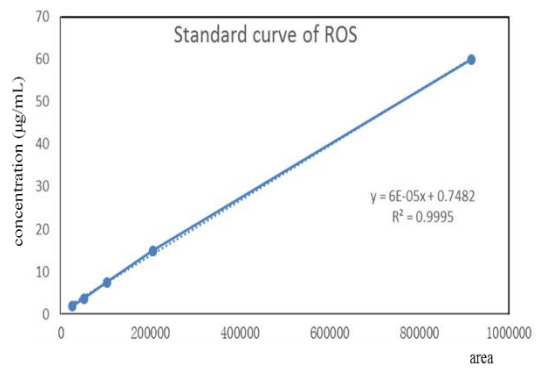

Supplement: pone.0230200.s003.pdf [file pone.0230200.s003.pdf]
