# Supplementary material for: An in vitro evaluation of the effects of different statins on the structure and function of human gut bacterial community
Source: PubMed Central journal article supplement (PMC7098552; doi:10.1371/journal.pone.0230200), 2020-03-26

### S3 Fig Basic analysis of sequenced data.

A, Rarefaction curves of sequenced samples. B, The Shannon-Wiener curves of the sequenced samples. C, Rank-abundance distribution curve of the sequenced samples. D, Specaccum analysis of the sequenced samples.

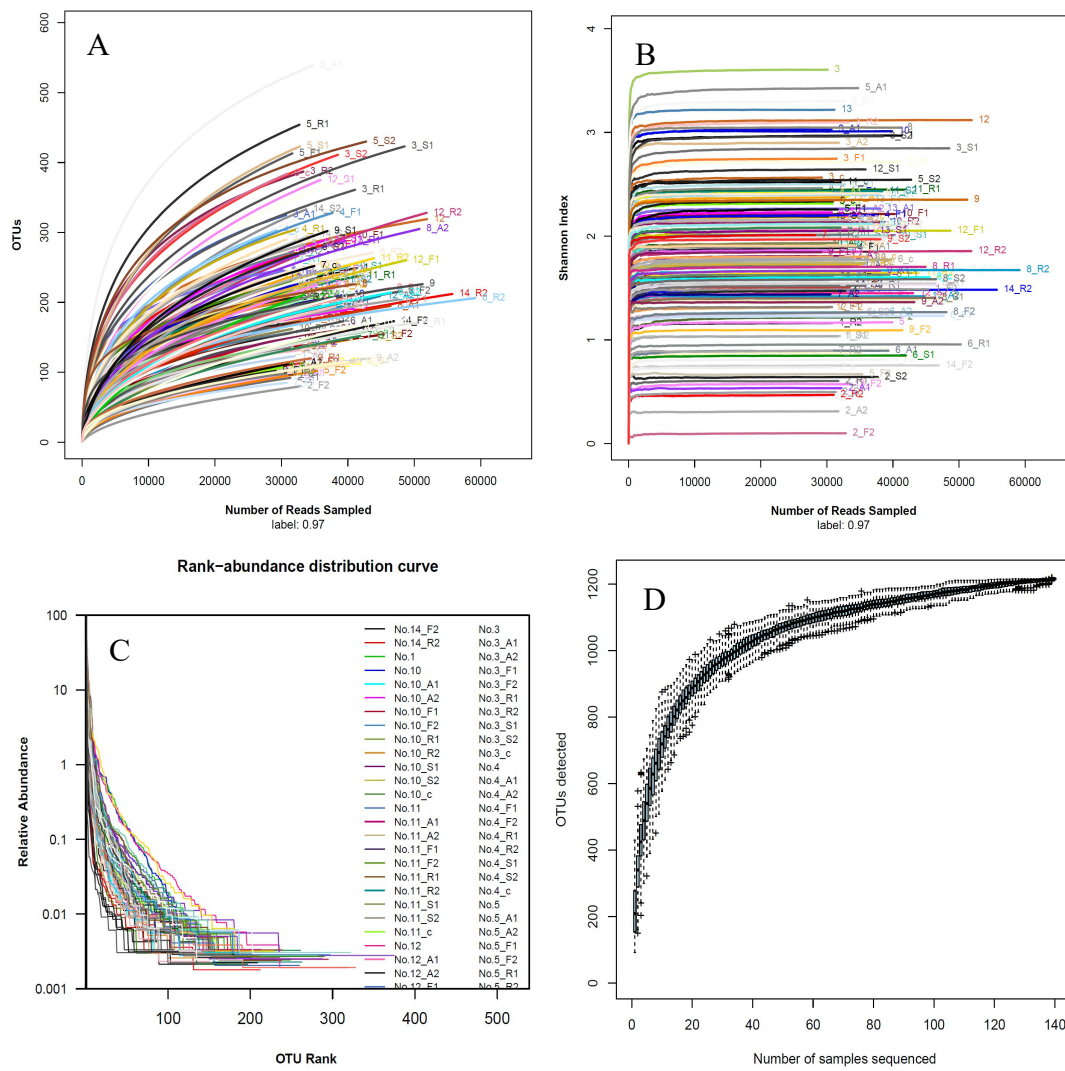

Supplement: pone.0230200.s004.pdf [file pone.0230200.s004.pdf]
