# Supplementary material for: An in vitro evaluation of the effects of different statins on the structure and function of human gut bacterial community
Source: PubMed Central journal article supplement (PMC7098552; doi:10.1371/journal.pone.0230200), 2020-03-26

## S4 Fig LEFSe analysis of different abundant bacterial taxa between groups

### ATO2 and control.

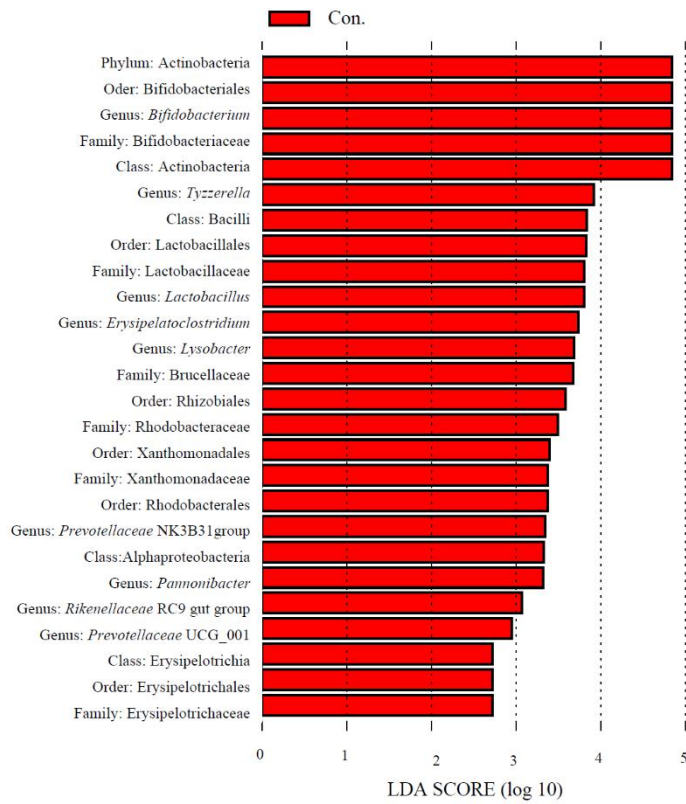

Supplement: pone.0230200.s005.pdf [file pone.0230200.s005.pdf]
